# Supplementary material
Source: publisher site journal article supplement (https://www.spandidos-publications.com/4898/downloadSupplementary)
Supplement: Supplementary file 1 [file downloadSupplementary]

## Sheet: Sheet1
Table SI. Database with all the patiens included in the study along with the risk factors identified.
Patient no.	Risk factors							Total no. of risk factors	Risk Group	Amputation
	Smoking	Obesity	Heart conditions	Dyslipidaemia	Duration of diabetes >5 years	Hepatic steatosis	Glycated haemoglobin >7,5 %			YES/ NO
1	1	0	1					2	B	YES
2	0	1	1		1		1	4	C	YES
3	0	0			1			1	A	NO
4	0	0	1					1	A	NO
5	0	0			1	1	1	3	B	YES
6	0	0	1					1	A	NO
7	1	1	1	1	1		1	6	D	YES
8	0	0			1			1	A	NO
9	0	0				1		1	A	NO
10	0	0	1		1		1	3	B	YES
11	1	0						1	A	NO
12	0	1						1	A	NO
13	0		1				1	2	B	YES
14	0		1				1	2	B	NO
15	1	1	1					3	B	YES
16	0					1		1	A	YES
17	0							0	A	NO
18	0		1					1	A	NO
19	1					1		2	B	YES
20	0	1	1		1	1		4	C	YES
21	0							0	A	NO
22	0							0	A	NO
23	0		1					1	A	NO
24	1		1			1	1	4	C	YES
25	0	1						1	A	NO
26	0		1					1	A	YES
27	0				1			1	A	YES
28	0		1					1	A	NO
29	1	1	1		1	1	1	6	D	YES
30	0							0	A	NO
31	0		1					1	A	NO
32	0							0	A	NO
33	0		1			1		2	B	YES
34	0							0	A	NO
35	0		1					1	A	NO
36	0	1	1		1		1	4	C	YES
37	0					1		1	A	NO
38	0		1					1	A	YES
39	0							0	A	NO
40	1	1	1				1	4	C	YES
41	0							0	A	NO
42	0	1						1	A	NO
43	0		1					1	A	YES
44	0							0	A	NO
45	0		1					1	A	NO
46	0	1			1			2	B	NO
47	0		1					1	A	NO
48	0		1					1	A	NO
49	1		1					1	A	YES
50	1	1	1		1	1	1	6	D	YES
51	0							0	A	YES
52	0		1					1	A	YES
53	0	1						1	A	NO
54	0		1					1	A	YES
55	0							0	A	YES
56	0		1		1			2	B	YES
57	0							0	A	YES
58	0		1					1	A	NO
59	0	1						1	A	NO
60	0		1	1	1	1	1	5	C	YES
61	1							1	A	NO
62	0		1					1	A	NO
63	0	1	1		1		1	4	C	YES
64	0				1			1	A	NO
65	0		1					1	A	NO
66	0							0	A	NO
67	0		1					1	A	YES
68	0							0	A	NO
69	0		1					1	A	NO
70	1	1	1					3	B	YES
71	0							0	A	NO
72	0		1					1	A	NO
73	0		1				1	2	B	YES
74	0		1					1	A	NO
75	0		1					1	A	NO
76	1	1	1	1		1	1	6	D	YES
77	0							0	A	NO
78	0		1					1	A	NO
79	0		1					1	A	YES
80	0	1	1	1	1	1	1	6	D	NO
81	0	1				1		2	B	YES
82	0		1					1	A	NO
83	0		1					1	A	NO
84	0	1			1		1	3	B	YES
85	0		1					1	A	NO
86	0							0	A	NO
87	0		1					1	A	NO
88	1	1						2	B	YES
89	0				1			1	A	NO
90	0		1					1	A	NO
91	0	1	1	1				3	B	YES
92	0							0	A	NO
93	0		1					1	A	NO
94	0		1					1	A	NO
95	0			1				1	A	NO
96	1	1	1		1	1	1	6	D	YES
97	0		1					1	A	NO
98	0	1						1	A	NO
99	0		1		1			2	B	YES
100	0					1		1	A	NO
101	0		1	1	1	1	1	5	C	YES
102	0		1					1	A	NO
103	0			1				1	A	NO
104	0	1	1		1		1	4	C	YES
105	0							0	A	NO
106	0		1	1				2	B	NO
107	0		1					1	A	YES
108	0		1		1			2	B	NO
109	0	1	1			1		3	B	YES
110	0			1				1	A	NO
111	0		1					1	A	NO
112	1			1			1	3	B	YES
113	0		1					1	A	NO
114	0				1			1	A	NO
115	0	1	1	1	1	1	1	6	D	YES
116	0		1					1	A	NO
117	0			1				1	A	NO
118	0		1					1	A	NO
119	0		1	1				2	B	YES
120	0			1		1		2	B	NO
121	1	1	1	1	1		1	6	D	YES
122	0							0	A	NO
123	0		1	1				2	B	YES
124	0		1			1		2	B	YES
125	0			1	1			2	B	NO
126	0		1					1	A	NO
127	0		1					1	A	NO
128	0				1			1	A	NO
129	0	1	1				1	3	B	YES
130	0		1					1	A	NO
131	0		1		1			2	B	NO
132	0		1					1	A	NO
133	1	1				1		2	B	YES
134	0		1					1	A	NO
135	0	1						1	A	NO
136	0		1	1	1	1	1	5	C	YES
137	0		1					1	A	NO
138	0		1					1	A	NO
139	0	1		1				2	B	NO
140	0		1	1				2	B	YES
141	0		1					1	A	NO
142	0		1					1	A	NO
143	0	1						1	A	NO
144	1		1	1	1		1	4	C	YES
145	0			1				1	A	NO
146	0		1		1			2	B	NO
147	0	1		1				2	B	YES
148	0		1		1			2	B	NO
149	0		1			1		2	B	YES
150	0			1				1	A	NO
151	1	1	1					3	B	YES
152	0		1					1	A	NO
153	0	1		1	1		1	4	C	YES
154	0							0	A	NO
155	0		1					1	A	YES
156	0			1			1	2	B	NO
157	0			1		1		2	B	NO
158	0		1					1	A	NO
159	0			1				1	A	NO
160	0		1	1	1		1	4	C	YES
161	1		1					1	A	NO
162	0	1			1			2	B	NO
163	0		1					1	A	NO
164	0	1		1	1			3	B	YES
165	0		1					1	A	NO
166	0	1		1				2	B	NO
167	0		1					1	A	NO
168	0		1					1	A	NO
169	1	1			1			3	B	YES
170	0		1	1				2	B	NO
171	0		1					1	A	NO
172	0	1	1	1	1		1	5	C	YES
173	0		1					1	A	NO
174	0		1	1			1	3	B	YES
175	0	1			1			2	B	YES
176	0		1					1	A	NO
177	0			1				1	A	NO
178	0		1	1	1	1	1	5	C	YES
179	0		1					1	A	NO
180	0	1		1				2	B	NO
181	0		1					1	A	NO
182	0			1				1	A	NO
183	0		1					1	A	NO
184	0	1			1			2	B	NO
185	0	1						1	A	NO
186	0		1					1	A	YES
187	0	1						1	A	NO
188	0		1					1	A	NO
189	0		1	1				2	B	NO
190	0	1	1					2	B	NO
191	0		1					1	A	NO
192	0		1		1		1	3	B	YES
193	0	1						1	A	NO
194	0		1	1				2	B	NO
195	0		1	1				2	B	NO
196	0		1					1	A	NO
197	0	1	1				1	3	B	YES
198	0		1	1	1		1	4	C	YES
199	0		1					1	A	NO
200	0	1		1				2	B	YES
201	0	1						1	A	NO
202	0		1					1	A	NO
203	0	1	1		1		1	4	C	NO
204	0			1				1	A	NO
205	0		1					1	A	NO
206	0	1						1	A	NO
207	0		1					1	A	NO
208	0	1						1	A	NO
209	0		1	1				2	B	YES
210	0		1					1	A	NO
211	0	1	1	1	1			4	C	NO
212	0		1	1	1		1	4	C	NO
213	0			1				1	A	NO
214	0	1						1	A	NO
215	0		1	1				2	B	NO
216	0	1		1				2	B	NO
217	0	1	1				1	3	B	YES
218	0	1						1	A	NO
219	0		1	1				2	B	NO
220	0							0	A	NO
221	0						1	1	A	NO
222	0	1		1				2	B	YES
223	0			1				1	A	NO
224	0	1		1				2	B	YES
225	0			1				1	A	NO
226	0	1						1	A	NO
227	0			1	1		1	3	B	YES
228	0	1						1	A	NO
